# Supplementary material for: Visible light-driven methanol dehydrogenation and conversion into 1,1-dimethoxymethane over a non-noble metal photocatalyst under acidic conditions
Source: Royal Society of Chemistry journal article supplement (doi:10.1039/c8cy01030g), 2018-01-01
Supplement: c8cy01030g1.pdf [file c8cy01030g1.pdf]

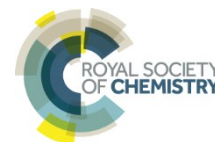

Journal Name

ARTICLE

## ***Electronic Supplementary Information***

# **Visible light-driven methanol dehydrogenation and convert into 1, 1-dimethoxymethane over non-noble metal photocatalyst under acid condition**

Yuguang Chao,<sup>a,b,c</sup> Jianping Lai,<sup>c</sup> Yong Yang,<sup>c</sup> Peng Zhou,<sup>c</sup> Yelong Zhang,<sup>c</sup> Zijie, Mu,<sup>c</sup> Shiyong Li,<sup>a,b</sup> Jianfeng, Zheng,<sup>\*a</sup> Zhenping Zhu,<sup>a</sup> and Yisheng Tan<sup>\*a</sup>

<sup>a</sup> State Key Laboratory of Coal Conversion, Institute of Coal Chemistry, Chinese Academy of Sciences, Taiyuan , 030001, P. R. China.

<sup>b</sup> University of Chinese Academy of Sciences , Beijing, 100049, P. R. China

<sup>c</sup> Department of Materials Science and Engineering, College of Engineering, Peking University, Beijing 100871, P. R.China.

## **Experimental section**

### **1. The preparation of 1wt% CdS@MoS<sub>2</sub>**

Just like the procedure of the preparation of CdS@NiMoS, the prepared CdS NRs sample (0.6 g), Na<sub>2</sub>MoO<sub>4</sub> · 2H<sub>2</sub>O (3 mg) and L-cystiene (4 mg) were dispersed into 30 mL distilled water by sonication for 10 min. After stirring for another 30 min, the obtained mixture was transferred to a 50 mL Teflon-lined stainless steel autoclave, and reacted at 200 °C for 24 hours. The as-prepared products were separated by centrifugation, followed by washing with distilled water and ethanol several times. After being dried at 60 °C overnight in a vacuum, the yellow green CdS@MoS<sub>2</sub> products were obtained.

### **2. The preparation of 1wt% CdS@NiS**

To keep the same prepared conditions of all samples, the synthesis of 1wt% CdS@NiS like the ways above. The pure as-prepared CdS nanorods (0.6g), NiCl<sub>2</sub> · 6H<sub>2</sub>O (5 mg) and L-cystiene (4 mg) were dispersed into 30 mL distilled water by sonication for 10 min. After stirring for another 30 min, the obtained mixture was transferred to a 50 mL Teflon-lined stainless steel autoclave, and reacted at 200 °C for 24 hours. The as-prepared products were separated by centrifugation, followed by washing with distilled water and ethanol several times. The products were obtained after being dried at 60 °C overnight in a vacuum.

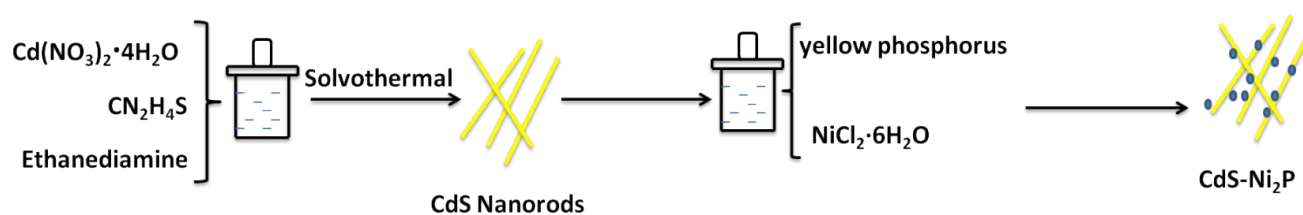

Fig. S1 Schematic illustration of the synthetic process of the CdS/ $\text{Ni}_2\text{P}$  hybrid photocatalyst.

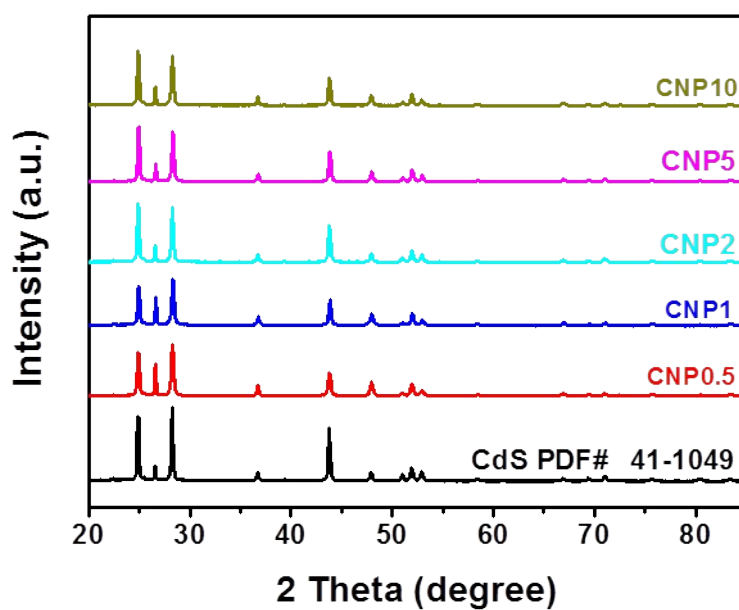

Fig. S2 X-ray diffraction patterns for CdS NRs and CdS/ $\text{Ni}_2\text{P}$  samples loading with various amounts of  $\text{Ni}_2\text{P}$ .

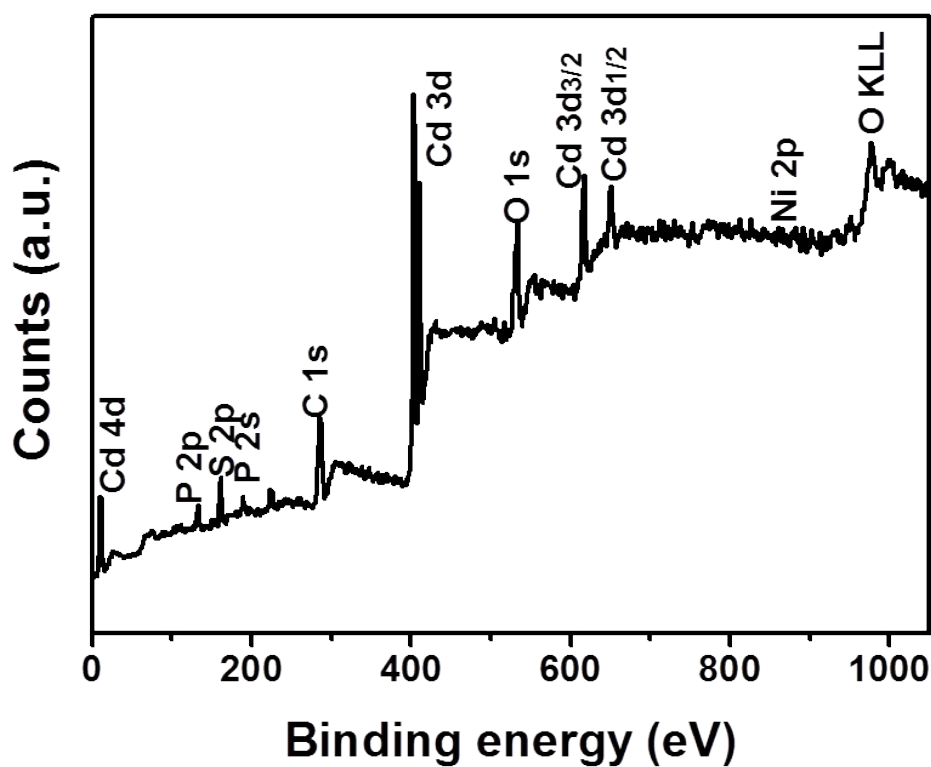

Fig. S3 XPS survey scan of CdS/Ni<sub>2</sub>P-1wt% sample.

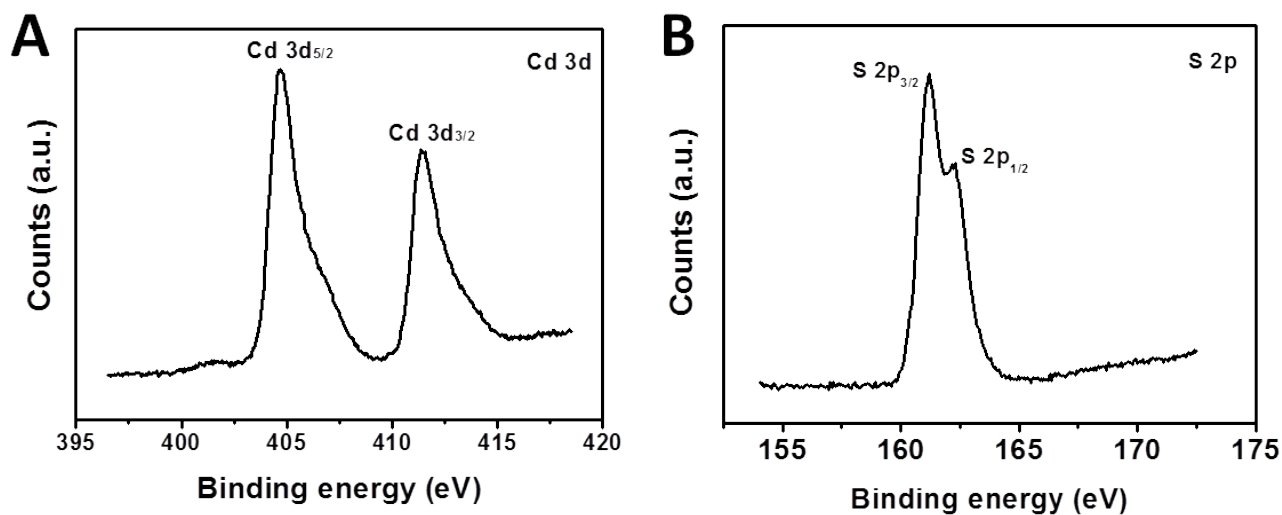

Fig. S4 XPS spectrums of Cd 3d (a), S 2p (b) in the samples of CdS/Ni<sub>2</sub>P.

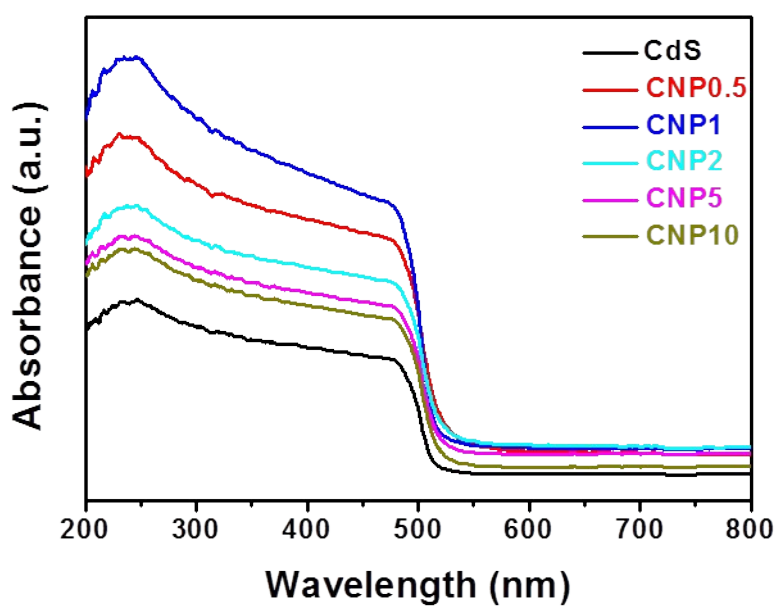

Fig. S5 UV-vis diffuse reflectance spectra (DRS) of CdS NRs and CdS/Ni<sub>2</sub>P (CNP) loading with various amounts of Ni<sub>2</sub>P.

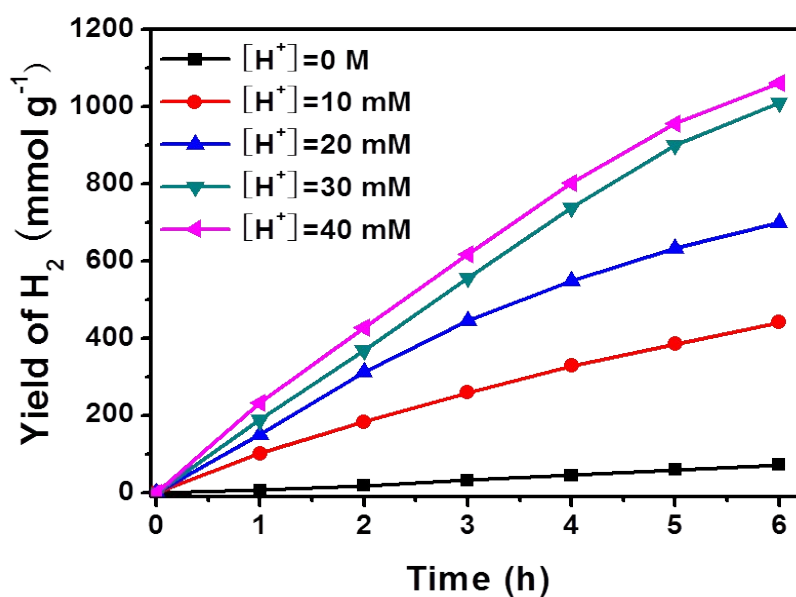

Fig. S6 Yield of H<sub>2</sub> production over CdS/Ni<sub>2</sub>P-1wt% photocatalyst with different H<sup>+</sup> concentration.

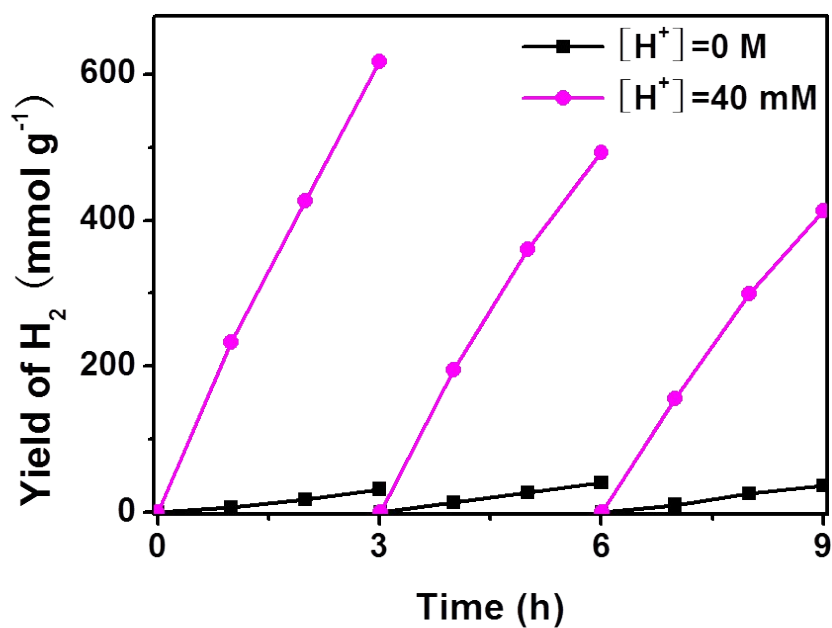

Fig. S7 The photocatalytic activity cycles of CdS/Ni<sub>2</sub>P-1wt% with or without H<sup>+</sup> in the reaction system.

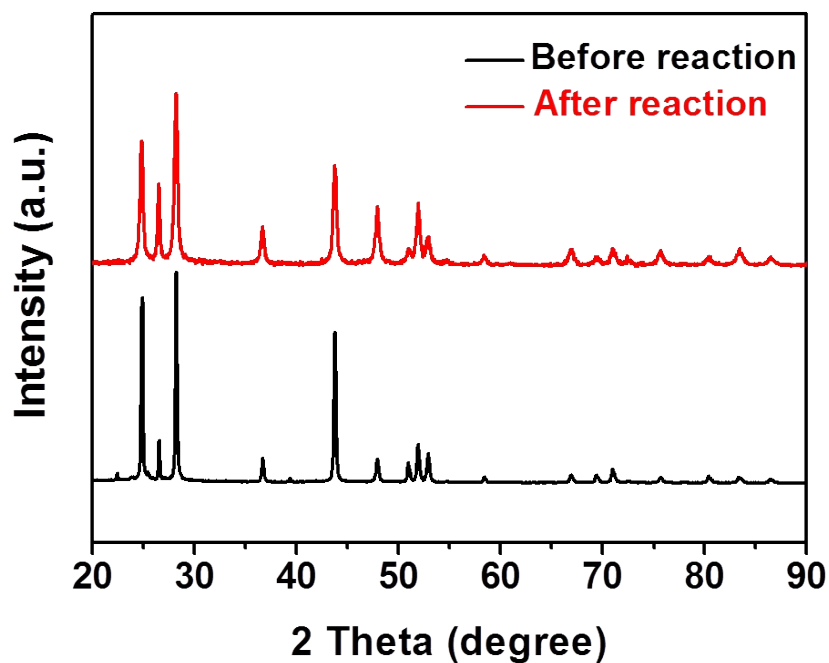

Fig. S8 The XRD spectra comparison of CdS/Ni<sub>2</sub>P sample before and after photocatalytic reaction.

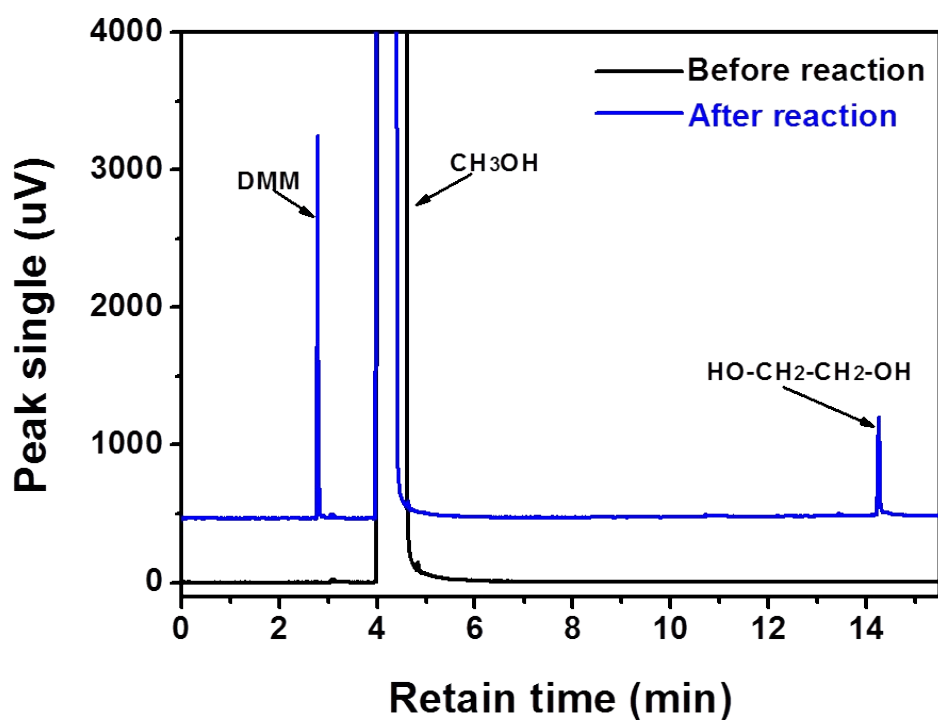

Fig. S9 Gas chromatogram of the liquid sample before and after photocatalytic reaction.

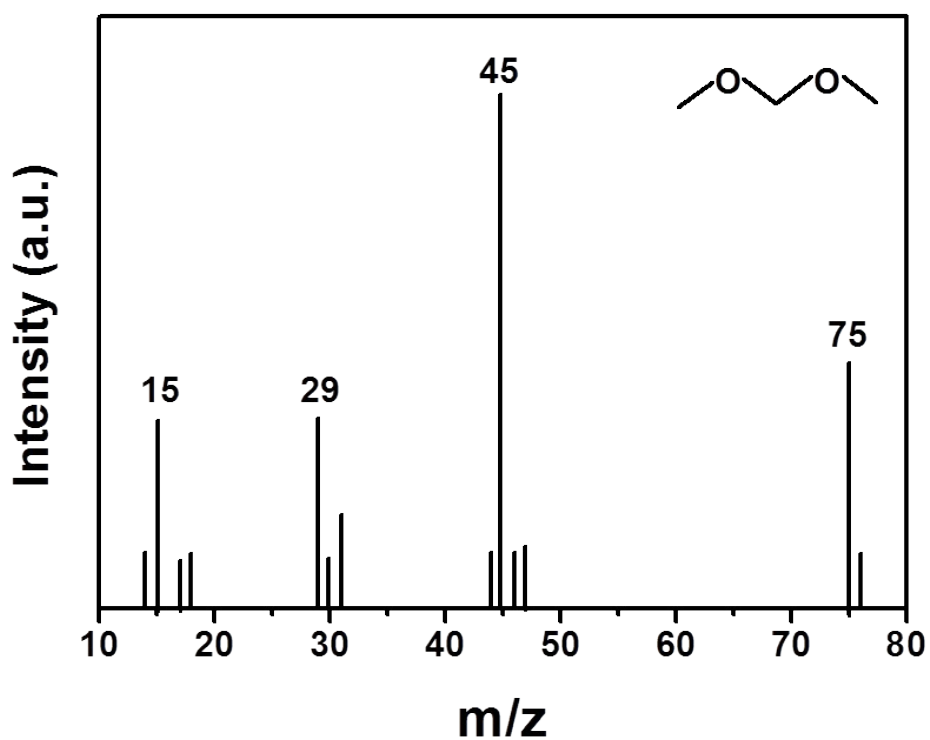

Fig. S10 Mass spectrum of the produced DMM.

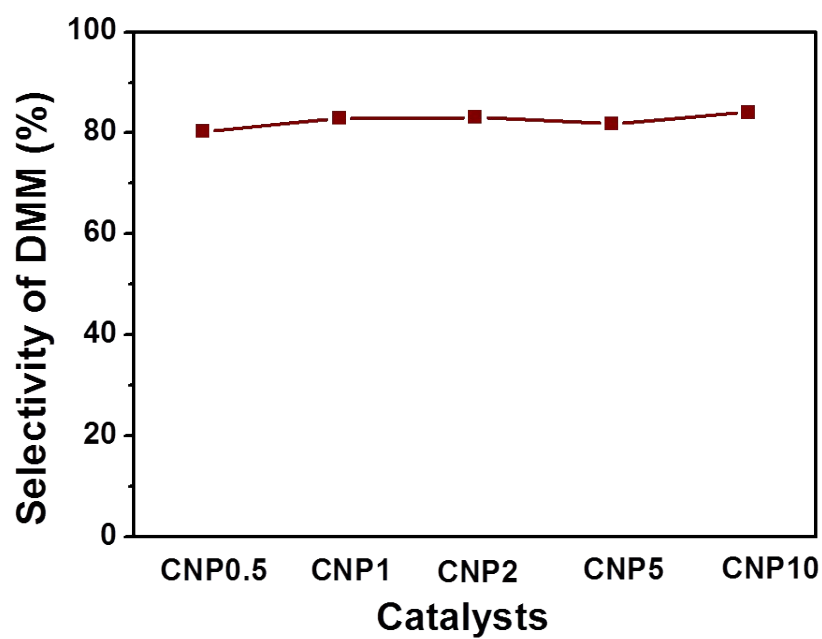

Fig. S11 The selectivity of DMM over different photocatalyst samples.
